# Supplementary material for: The Smaug RNA-Binding Protein Is Essential for microRNA Synthesis During the Drosophila Maternal-to-Zygotic Transition
Source: PubMed Central journal article supplement (PMC5100853; doi:10.1534/g3.116.034199), 2016-09-01

# Supplementary Figure S4

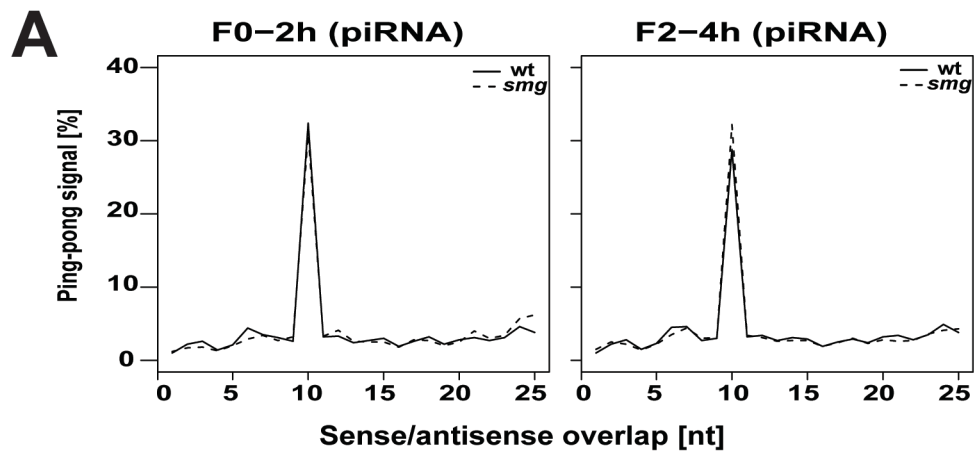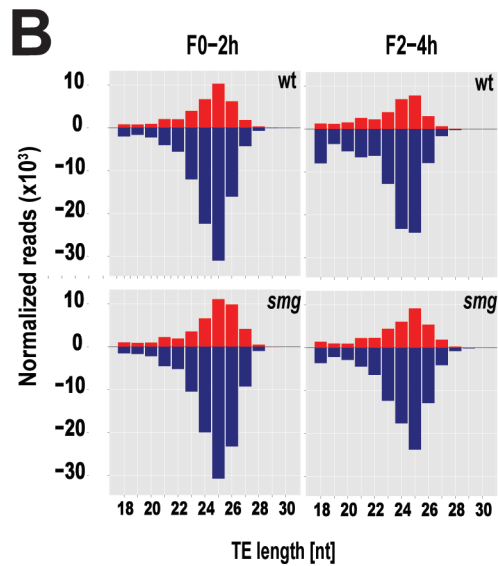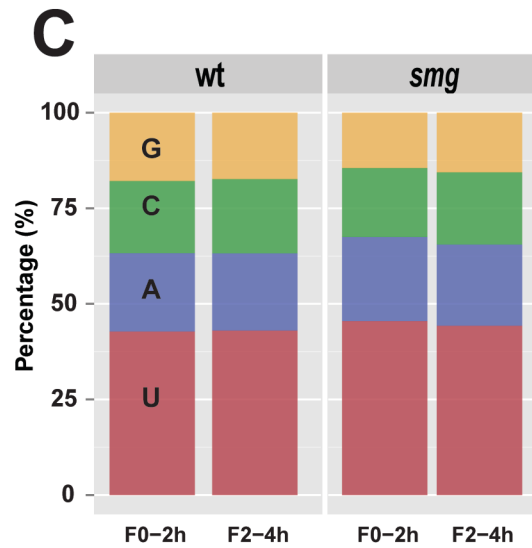

Supplement: supp_g3.116.034199_FigureS4.pdf [file supp_g3.116.034199_FigureS4.pdf]
